# Supplementary material
Source: publisher figshare collection journal article supplement (https://rs.figshare.com/ndownloader/files/17946839)
Supplement: Supplementary file 1 [file 17946839]

**Supplementary figure S1**


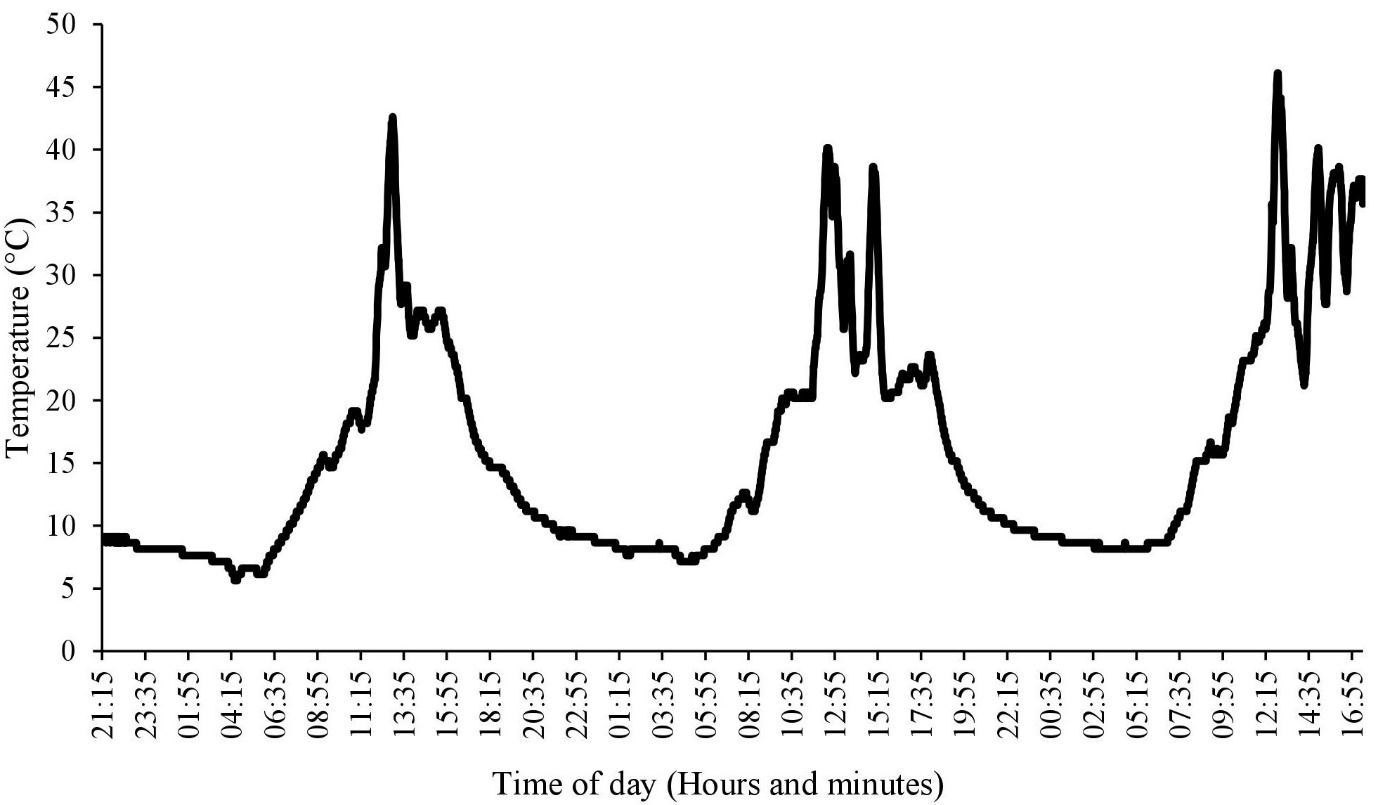


**Figure S1:** Temperature data from the site of collection (Lat: 61.180 °N, Long: 45.400 °W) spanning 68 hours. Temperature was continuously measured, at ground level, in the period of 10th august – 13th august, 2017 (Maxim IButton DS1923#F5 temperature data logger).
